# Supplementary material
Source: PubMed Central journal article supplement (PMC6889173)
Supplement: NIHMS1539164-supplement-1.pdf [file NIHMS1539164-supplement-1.pdf]

## Supplementary data

### GAC inhibitors with a 4-hydroxypiperidine spacer: Requirements for potency

Lee McDermott<sup>a,b,\*</sup>, David Koes<sup>c</sup>, Shabber Mohammed<sup>a</sup>, Prema Iyer<sup>a</sup>, Melissa Bobby<sup>a</sup>, Venkatakrishnan Balasubramanian<sup>a,d</sup>, Mackenzie, Geedy<sup>a</sup>, William Katt<sup>e</sup> and Richard Cerione<sup>e,f,g</sup>

<sup>a</sup>University of Pittsburgh, Department of Pharmaceutical Sciences, Pittsburgh, PA 15260, USA

<sup>b</sup>University of Pittsburgh, Drug Discovery Institute, Pittsburgh, PA 15269, USA

<sup>c</sup>University of Pittsburgh, Department of Computational and Systems Biology, Pittsburgh, PA 15260, USA

<sup>d</sup>SASTRA Deemed University, Department of Chemical Engineering, Tamil Nadu, Tirumalaisamudram, 613401, India

<sup>e</sup>Cornell University, Department of Molecular Medicine, Ithaca, NY 14853, USA

<sup>f</sup>Cornell University, Cornell High Energy Synchrotron Source (CHESS), Ithaca, NY 14853, USA

<sup>g</sup>Cornell University, Department of Chemistry and Chemical Biology, Ithaca, New York 14853, United States

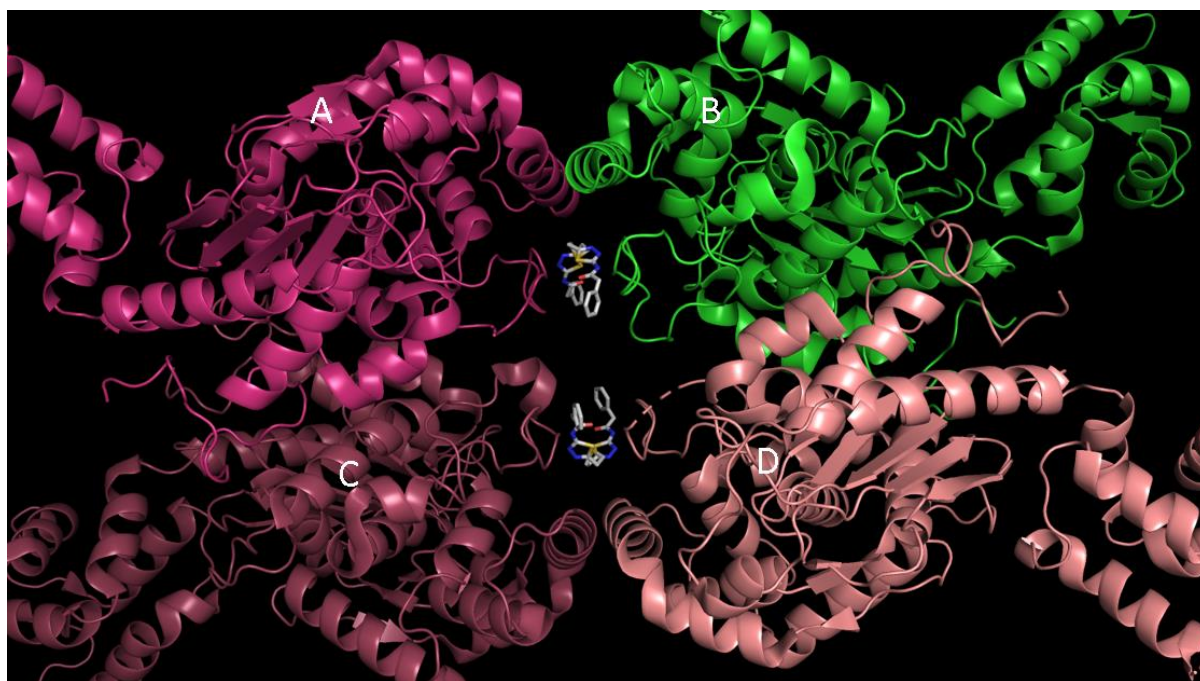

**Suppl. Figure 1.** Binding of BPTES (in white) in the allosteric pocket formed between interacting GAC dimers (A-B) and (C-D). PDB: 3UO9

#### Compounds UPGL00019, UPMP00020, 2, 3, 4a, 5a, 6j

Preparation and spectral data for UPGL00019, UPMP00020, 2, 3, 4a, 5a, 6j have been previously disclosed.<sup>1</sup> In that disclosure UPGL00019 is noted as 14d, UPGL00020 as 14i, intermediate 2 as 11d, intermediate 3 as 12d, intermediate 4a as 15d, intermediate 5a as 16d, and compound 6j as 14j

\* Corresponding author. E-mail: lam179@pitt.edu

## Acylation of intermediates 3 and 5

### General acylation procedure 1 (HATU coupling)

Desired intermediate 4-hydroxypiperidino-aminothiadiazole (1 eq) in dry DMF (approximately 0.05 mL/mg of limiting reagent) was treated with Et<sub>3</sub>N (3 eq) and the carboxylic acid chosen as acylation partner (1.1 eq). To this mixture HATU was then added at room temperature. The reaction mixture was allowed to stir until consumption of the limiting reagent was judged complete by TLC. Followed concentration of the volatiles to a small volume or evaporation to dryness and then treatment with water to form a suspension of the product. Filtration of the solids, followed by wash with water (3X) and then drying afforded the desired compound. Further purification, if needed, was effected via silica gel column chromatography or trituration.

### General acylation procedure 2 (Acyl chloride/acyl anhydride coupling)

Desired 4-hydroxypiperidino-aminothiadiazole (1 eq) in dry DMF (approximately 0.05 mL/mg of limiting reagent) was treated with Et<sub>3</sub>N (3 eq) and a chosen acyl chloride or acyl anhydride partner (1.2 eq) at room temperature. The reaction mixture was stirred at room temperature until consumption of the limited reagent was judged complete by TLC. Followed concentration of the volatiles to small volume and then treatment with water to form a suspension of the crude product. Solids, were filtered washed with water (3X) and dried to afford the desired compound. Further purification, if needed, was effected via silica gel column chromatography or trituration.

### General procedure 3, Synthesis of intermediates 5 (DMSO solvent)

Desired N-Boc protected 4-hydroxypiperidyl thiadiazole **4** (1 eq.) was dissolved in 4N HCl in dioxane at room temperature and the mixture was stirred until TLC indicated consumption of the starting material. Followed evaporation of the volatiles to dryness and then treatment of the resulting residue with DMSO (approximately 0.05 mL/mg based on N-Boc protected piperidyl thiadiazole weight). The mixture was then treated with 2-amino-5-bromothiadiazole (1 eq.) and K<sub>2</sub>CO<sub>3</sub> (4 eq.) and stirred at 50-55 °C until TLC indicated consumption of 2-amino-5-bromothiazole. Reaction mixture was then treated with excess of water and the pH of the mixture was adjusted to 6 with dilute aqueous HCl. The suspension formed from this operation was filtered, and the solid obtained was washed with water and dried to afford the corresponding monoacyl bis thiadiazole derivative **5**. Further purification, if needed, was effected via silica gel column chromatography.

### General procedure 4, Synthesis of intermediates 5 (EtOH solvent)

Desired N-Boc protected piperidyl thiadiazole **4** (1 eq.) was dissolved in 4N HCl in dioxane at room temperature. The mixture was stirred until TLC indicated consumption of the starting material. Followed evaporation of the volatiles to dryness and then treatment of the resulting residue with EtOH. This mixture was treated with 2-amino-5-bromothiadiazole (1 eq.) and Et<sub>3</sub>N (3 eq.) and then stirred at 80 °C (EtOH) until TLC indicated consumption of 2-amino-5-bromothiazole. Followed evaporation of the solvent to dryness and addition of water. The suspension formed from this operation was filtered and the solid obtained washed with water and dried to afford the corresponding monoacyl bis thiadiazole derivative **5**. Further purification, if needed, was effected via silica gel column chromatography.

### *tert*-Butyl 4-((5-pivalamido-1,3,4-thiadiazol-2-yl)oxy)piperidine-1-carboxylate (**4b**)

Compound was prepared from *tert*-butyl 4-((5-amino-1,3,4-thiadiazol-2-yl)oxy)piperidine-1-carboxylate (**3**)<sup>1</sup> and pivaloyl chloride according to general acylation procedure 2. The product was isolated as a tan solid after silica gel column chromatography with 0-5% MeOH in dichloromethane (223 mg, 69% yield). <sup>1</sup>H NMR (400 MHz, DMSO-*d*<sub>6</sub>) δ 1.22 (s, 9H), 1.40 (s, 9H), 1.64 (dddd, *J*=17.2, 12.8, 8.8, 4.0 Hz, 2H), 1.98-2.06 (m, 2H), 3.19 (apparent broad t, *J*=9.6 Hz, 2H), 3.62-3.69 (m, 2H), 5.05-5.12 (m, 1H), 11.93 (s, 1H).

***tert*-Butyl 4-((5-(cyclobutanecarboxamido)-1,3,4-thiadiazol-2-yl)oxy)piperidine-1-carboxylate (4c)**

Compound was prepared from *tert*-butyl 4-((5-amino-1,3,4-thiadiazol-2-yl)oxy)piperidine-1-carboxylate (**3**)<sup>1</sup> and cyclobutanecarboxylic acid according to general acylation procedure 1. The compound was isolated as an off-white solid after silica gel column chromatography using 0-100% EtOAc in hexanes gradient (200 mg, 78% yield).

<sup>1</sup>H NMR (400 MHz, CDCl<sub>3</sub>) δ 1.47 (s, 9H), 1.84-1.90 (m, 2H), 1.95-2.09 (m overlapping, 4H), 2.26-2.35 (m, 2H), 2.36-2.47 (m, 2H), 3.31 (ddd, *J*=12.4, 8.0, 3.6 Hz, 2H), 3.41-3.49 (m, 1H), 3.71-3.79 (m, 2H), 5.12-5.19 (m, 1H). <sup>1</sup>H NMR (600 MHz, DMSO-*d*<sub>6</sub>) δ 1.40 (s, 9H), 1.64 (ddd, *J*=17.4, 12.6, 4.2 Hz, 2H), 1.78-1.84 (m, 1H), 1.90-1.99 (m, 1H), 1.99-2.06 (m, 2H), 2.07-2.16 (m, 2H), 2.16-2.23 (m, 2H), 3.19 (apparent bs, 2H), 3.29-2.30 (m, 1H), 3.65 (m, 2H), 5.03-5.09 (m, 1H), 12.16 (s, 1H). ATR-IR (cm<sup>-1</sup>) 3168, 3099, 2971, 2932, 2868, 2828, 2752, 1693, 1567, 1508, 1478, 1454, 1405, 1364, 1319, 1302, 1262, 1240, 1219, 1202, 1164, 1132, 1096, 1049, 1017, 946, 867, 837, 821, 785, 771, 741, 694, 669. LC-MS (ESI) *m/z* calculated for C<sub>17</sub>H<sub>26</sub>N<sub>4</sub>O<sub>4</sub>S: 382.17, observed [M+H]: 383.5

***tert*-butyl 4-((5-(2-cyclopropylacetamido)-1,3,4-thiadiazol-2-yl)oxy)piperidine-1-carboxylate (4d)**

Compound was prepared from *tert*-butyl 4-((5-amino-1,3,4-thiadiazol-2-yl)oxy)piperidine-1-carboxylate (**3**)<sup>1</sup> and 2-cyclopropylacetic acid according to general acylation procedure 1. Desired compound was isolated as an off-white/beige solid (60 mg, 81% yield)

<sup>1</sup>H NMR (600 MHz, DMSO-*d*<sub>6</sub>) δ 0.30-0.34 (m, 2H), 0.63-0.67 (m, 2H), 1.17-1.24 (m, 1H), 1.50 (s, 9H), 1.86-1.91 (m, 2H), 2.07-2.14 (m, 2H), 2.54 (d, *J*=7.2 Hz, 2H), 3.34 (dddd, *J*=13.2, 12.0, 8.4, 3.6 Hz, 2H), 3.74-3.81 (m, 2H), 5.13-5.17 (m, 1H), 11.84 (s, 1H). LC-MS (ESI) *m/z* calculated for C<sub>17</sub>H<sub>26</sub>N<sub>4</sub>O<sub>4</sub>S: 382.17, observed [M+H]: 383.6

**N-(5-((1-(5-amino-1,3,4-thiadiazol-2-yl)piperidin-4-yl)oxy)-1,3,4-thiadiazol-2-yl)pivalamide (5b)**

The compound was prepared from *tert*-butyl 4-((5-pivalamido-1,3,4-thiadiazol-2-yl)oxy)piperidine-1-carboxylate (**4b**) according to general procedure 4. The product was isolated as an off-white, beige solid after silica gel column purification with 0-10% MeOH in CH<sub>2</sub>Cl<sub>2</sub> (93 mg, 47% yield).

<sup>1</sup>H NMR (400 MHz, DMSO-*d*<sub>6</sub>) δ 1.22 (s, 9H), 1.77-1.87 (m, 2H), 2.05-2.15 (m, 2H), 3.19-3.3.26 (m, 2H), 3.48-3.56 (m, 2H), 5.08-5.15 (s, 1H), 6.48 (s, 2H), 11.96 (s, 1H). ATR-IR (cm<sup>-1</sup>) 3424, 3392, 3226, 3117, 2969, 2957, 2933, 2828, 1661, 1625, 1603, 1548, 1490, 1460, 1399, 1370, 1333, 1307, 1296, 1270, 1260, 1250, 1183, 1163, 1149, 1120, 1044, 1012, 944, 925, 899, 821, 752, 690. LC-MS (ESI) *m/z* calculated for C<sub>14</sub>H<sub>21</sub>N<sub>7</sub>O<sub>2</sub>S<sub>2</sub>: 383.12, observed [M-H]: 382.5.

**N-(5-((1-(5-amino-1,3,4-thiadiazol-2-yl)piperidin-4-yl)oxy)-1,3,4-thiadiazol-2-yl)cyclobutanecarboxamide (5c)**

Compound was prepared from *tert*-butyl 4-((5-(cyclobutanecarboxamido)-1,3,4-thiadiazol-2-yl)oxy)piperidine-1-carboxylate (**4c**) as described in general procedure 3. The product was isolated as an off-white/tan solid. (40 mg, 80% yield).

<sup>1</sup>H NMR (600 MHz, DMSO-*d*<sub>6</sub>) δ 1.77-1.86 (m, 3H), 1.90-1.99 (m, 1H), 2.05-2.16 (m, 4H), 2.17-2.24 (m, 2H), 3.22 (ddd, *J*=12.6, 8.4, 3.6 Hz, 2H), 3.29-3.36 (m, 1H), 3.47-3.59 (m, 2H), 5.07-5.13 (m, 1H), 6.52 (s, 2H), 12.17 (s, 1H). ATR-IR (cm<sup>-1</sup>) 3395, 3281, 3169, 2938, 2840, 2747, 1683, 1561, 1498, 1452, 1373, 1337, 1298, 1252, 1229, 1202, 1175, 1116, 1090, 1044, 1015, 947, 919, 895, 869, 831, 791, 757, 733, 690. LC-MS (ESI) *m/z* calculated for C<sub>14</sub>H<sub>19</sub>N<sub>7</sub>O<sub>2</sub>S<sub>2</sub>: 381.10, observed [M+H]: 382.6

**N-(5-((1-(5-amino-1,3,4-thiadiazol-2-yl)piperidin-4-yl)oxy)-1,3,4-thiadiazol-2-yl)-2-cyclopropylacetamide (5d)**

The compound was prepared from *tert*-butyl 4-((5-(2-cyclopropylacetamido)-1,3,4-thiadiazol-2-yl)oxy)piperidine-1-carboxylate (**4d**) according to general procedure 3. It was isolated as an off-white beige solid (57 mg, 95% yield).

<sup>1</sup>H NMR (600 MHz, DMSO-*d*<sub>6</sub>) δ 0.172 (ddd, *J*=9.6, 6.0, 4.8 Hz, 2H), 0.47 (dddd, *J*=10.2, 7.8, 6.0, 4.2 Hz, 2H), 0.98-1.07 (m, 1H), 1.75-1.86 (m, 2H), 2.10-2.15 (m, 2H), 2.30 (d, *J*=7.2 Hz, 2H), 3.22 (ddd, *J*=

12.6, 9.0, 3.6 Hz, 2H), 3.49-3.54 (m, 2H), 5.08-5.13 (m, 1H), 6.49 (s, 2H), 12.24 (s, 1H). ATR-IR (cm<sup>-1</sup>) 3360, 3276, 3103, 2999, 2959, 2933, 2850, 2761, 2697, 1669, 1637, 1579, 1560, 1507, 1499, 1465, 1410, 1385, 1370, 1352, 1338, 1310, 1292, 1256, 1224, 1197, 1117, 1014, 968, 951, 938, 925, 910, 827, 810, 798, 769, 719, 688. LC-MS (ESI) *m/z* calculated for C<sub>14</sub>H<sub>19</sub>N<sub>7</sub>O<sub>2</sub>S<sub>2</sub>: 381.10, observed [M-H]: 380.6.

**N-(5-(4-((5-(2-phenylacetamido)-1,3,4-thiadiazol-2-yl)oxy)piperidin-1-yl)-1,3,4-thiadiazol-2-yl)propionamide (6a)**

Compound was prepared from N-(5-((1-(5-amino-1,3,4-thiadiazol-2-yl)piperidin-4-yl)oxy)-1,3,4-thiadiazol-2-yl)-2-phenylacetamide (**5a**) and propionic anhydride according to general procedure 2. The product was isolated as an off-white/beige solid (30 mg, 88% yield).

<sup>1</sup>H NMR (600 MHz, DMSO-*d*<sub>6</sub>) δ 1.06 (t, *J*=7.2 Hz, 3H), 1.85 (dddd, *J*=16.8, 12.0, 8.4, 3.6 Hz, 2H), 2.12-2.17 (m, 2H), 2.39 (q, *J*=7.8 Hz, 2H), 3.37 (ddd, *J*=12.6, 9.0, 3.6 Hz, 2H), 3.64-3.69 (m, 2H), 3.76 (s, 2H), 5.12-5.16 (m, 1H), 7.24-7.34 (m, 5H), 11.99 (s, 1H), 12.58 (s, 1H). ATR-IR (cm<sup>-1</sup>) 3268, 3171, 3089, 3043, 2905, 2832, 2758, 1688, 1571, 1496, 1453, 1418, 1384, 1366, 1352, 1315, 1297, 1269, 1253, 1232, 1208, 1192, 1143, 1116, 1015, 974, 948, 922, 907, 816, 796, 782, 756, 727, 698. LC-MS (ESI) *m/z* calculated for C<sub>20</sub>H<sub>23</sub>N<sub>7</sub>O<sub>3</sub>S<sub>2</sub>: 473.13, observed [M-H]:472.5

**N-(5-(4-((5-(2-phenylacetamido)-1,3,4-thiadiazol-2-yl)oxy)piperidin-1-yl)-1,3,4-thiadiazol-2-yl)isobutyramide (6b)**

This compound was prepared from N-(5-((1-(5-amino-1,3,4-thiadiazol-2-yl)piperidin-4-yl)oxy)-1,3,4-thiadiazol-2-yl)-2-phenylacetamide (**5a**) and isobutrylchloride according to general procedure 2. The product was isolated as a white/off-white solid after silica gel column purification with 0-5% MeOH in CH<sub>2</sub>Cl<sub>2</sub> (90 mg, 58 % yield).

<sup>1</sup>H NMR (400 MHz, DMSO-*d*<sub>6</sub>) δ 1.09 (d, *J*=6.8 Hz, 6H), 1.79-1.89 (m, 2H), 2.11-2.18 (m, 2H), 2.69 (q, *J*=6.8 Hz, 1H); 3.34-3.341 (m, 2H); 3.64-3.71 (m, 2H); 3.76 (s, 2H), 5.12-5.18 (m, 1H), 7.25-7.37 (m, 5H), 11.98 (s, 1H), 12.56 (s, 1H). ATR-IR (cm<sup>-1</sup>) 3172, 3091, 2969, 2903, 2849, 1686, 1565, 1501, 1452, 1385, 1375, 1348, 1299, 1253, 1205, 1159, 1136, 1095, 1053, 1020, 968, 943, 901, 872, 840, 817, 780, 756, 744, 724, 694, 642. LC-MS (ESI) *m/z* calculated for C<sub>21</sub>H<sub>25</sub>N<sub>7</sub>O<sub>3</sub>S<sub>2</sub>: 487.15, observed [M-H]: 486.3.

**N-(5-(4-((5-(2-phenylacetamido)-1,3,4-thiadiazol-2-yl)oxy)piperidin-1-yl)-1,3,4-thiadiazol-2-yl)cyclopropanecarboxamide (6c)**

The compound was prepared via the acylation of N-(5-((1-(5-amino-1,3,4-thiadiazol-2-yl)piperidin-4-yl)oxy)-1,3,4-thiadiazol-2-yl)-2-phenylacetamide (**5a**) with cyclopropanecarboxylic acid according to general procedure 1. The product was isolated as a white/off-white solid after trituration with hot CH<sub>2</sub>Cl<sub>2</sub> (72 mg, 63 % yield).

<sup>1</sup>H NMR (400 MHz, DMSO-*d*<sub>6</sub>) δ 0.85-0.92 (m, 4H), 1.80-1.92 (m, 3H), 2.1-2.16 (broad m, 2H), 3.38-3.41 (m, 2H), 3.64-3.39 (m, 2H), 3.76 (s, 2H), 5.10-5.17 (m, 1H), 7.24-7.36 (m, 5H), 12.30 (s, 1H), 12.56 (s, 1H). ATR-IR (cm<sup>-1</sup>) 3175, 3096, 3047, 3007, 2945, 2924, 2883, 2845, 2757, 1687, 1575, 1499, 1457, 1405, 1391, 1349, 1337, 1311, 1261, 1243, 1221, 1199, 1182, 1159, 1144, 1109, 1089, 1062, 1047, 1017, 958, 920, 876, 837, 795, 784, 755, 734, 723, 696, 670. LC-MS (ESI) *m/z* calculated for C<sub>21</sub>H<sub>23</sub>N<sub>7</sub>O<sub>3</sub>S<sub>2</sub>: 485.13, observed [M-H]: 484.2.

**N-(5-(4-((5-(2-phenylacetamido)-1,3,4-thiadiazol-2-yl)oxy)piperidin-1-yl)-1,3,4-thiadiazol-2-yl)cyclobutanecarboxamide (6d)**

Compound prepared from N-(5-((1-(5-amino-1,3,4-thiadiazol-2-yl)piperidin-4-yl)oxy)-1,3,4-thiadiazol-2-yl)-2-phenylacetamide (**5a**) and cyclobutanecarboxylic acid according to general procedure 1. The compound was isolated as a white solid after a suspension/trituration with hot CH<sub>2</sub>Cl<sub>2</sub> (56 mg, 76% yield).

<sup>1</sup>H NMR (400 MHz, DMSO-*d*<sub>6</sub>) δ 1.75-1.98 (m overlapping, 4H), 2.10-2.24 (m, 6H), 3.31-3.41 (m, 2H), 3.64-3.70 (m, 2H), 3.76 (s, 2H), 5.10-5.17 (m, 1H), 7.24-7.36 (m, 5H), 11.88 (s, 1H), 12.57 (s, 1H). ATR-IR (cm<sup>-1</sup>) 3172, 3094, 3044, 2974, 2934, 2899, 2840, 2752, 1697, 1685, 1562, 1496, 1450, 1374, 1314,

1297, 1263, 1252, 1201, 1129, 1077, 1052, 1020, 991, 968, 950, 919, 897, 870, 835, 815, 780, 757, 743, 722, 696, LC-MS (ESI)  $m/z$  calculated for  $C_{22}H_{25}N_7O_3S_2$ : 499.15, observed [M-H]: 498.2.

**2-cyclopropyl-N-(5-(4-((5-(2-phenylacetamido)-1,3,4-thiadiazol-2-yl)oxy)piperidin-1-yl)-1,3,4-thiadiazol-2-yl)acetamide (6e)**

This compound was prepared via the acylation of N-(5-((1-(5-amino-1,3,4-thiadiazol-2-yl)piperidin-4-yl)oxy)-1,3,4-thiadiazol-2-yl)-2-phenylacetamide (**5a**) with 2-cyclopropylacetic acid according to the general procedure 1. The product was obtained as an off-white/tan solid after trituration with hot  $CH_2Cl_2$  (27 mg, 38%).

$^1H$  NMR (300 MHz, DMSO-*d*6)  $\delta$  0.08-0.26 (m, 2H), 0.35-0.54 (m, 2H), 0.92-1.11 (m, 1H), 1.73-1.98 (m, 2H), 2.05-2.22 (m, 2H), 2.28 (d,  $J=6.0$  Hz, 2H), 3.33-3.48 (m, 2H), 3.58-3.72 (m, 2H), 3.76 (s, 2H), 5.05-5.25 (m, 1H), 7.15-7.45 (m, 5H), 11.96 (s, 1H), 12.57 (s, 1H). ATR-IR ( $cm^{-1}$ ) 3169, 3082, 2927, 2894, 2825, 2766, 1681, 1567, 1495, 1457, 1434, 1379, 1330, 1312, 1268, 1250, 1212, 1191, 1143, 1024, 975, 955, 928, 898, 830, 800, 781, 753, 733, 722, 695, 652. LC-MS (ESI)  $m/z$  calculated for  $C_{22}H_{25}N_7O_3S_2$ : 499.15, observed [M-H]: 498.4

**N-(5-((1-(5-(2-phenylacetamido)-1,3,4-thiadiazol-2-yl)piperidin-4-yl)oxy)-1,3,4-thiadiazol-2-yl)pivalamide (6f)**

Compound was prepared from N-(5-((1-(5-amino-1,3,4-thiadiazol-2-yl)piperidin-4-yl)oxy)-1,3,4-thiadiazol-2-yl)pivalamide (**5b**) and phenylacetic acid according to general procedure 1. Isolated as an off white solid (40 mg, 44% yield).

$^1H$  NMR (400 MHz, DMSO-*d*6)  $\delta$  1.22 (s, 9H), 1.84 (dddd,  $J=16.8, 12.4, 8.4, 4.0$  Hz, 2H), 2.10-2.17 (m, 2H), 3.37 (ddd,  $J=12.8, 8.4, 3.6$  Hz, 2H), 3.63-3.71 (m, 2H), 3.73 (s, 2H), 5.12-5.19 (m, 1H), 7.22-7.35 (m, 5H), 11.95 (s, 1H), 12.30 (s, 1H). ATR-IR ( $cm^{-1}$ ) 3156, 3087, 3029, 2965, 2928, 2906, 2870, 1677, 1566, 1549, 1493, 1457, 1400, 1380, 1350, 1332, 1302, 1277, 1260, 1223, 1187, 1152, 1129, 1074, 1055, 1023, 970, 954, 925, 899, 855, 824, 806, 754, 716, 692, 646. LC-MS (ESI)  $m/z$  calculated for  $C_{22}H_{27}N_7O_3S_2$ : 501.16, observed [M-H]: 500.3.

**N-(5-((1-(5-(2-cyclopropylacetamido)-1,3,4-thiadiazol-2-yl)piperidin-4-yl)oxy)-1,3,4-thiadiazol-2-yl)cyclobutanecarboxamide (6g)**

The compound was prepared from N-(5-((1-(5-amino-1,3,4-thiadiazol-2-yl)piperidin-4-yl)oxy)-1,3,4-thiadiazol-2-yl) cyclobutanecarboxamide (**5c**) and 2-cyclopropylacetic acid according to general procedure 1. The product obtained after filtration was chromatographed with silica gel column and 0-15% MeOH in  $CH_2Cl_2$  gradient. The chromatographed product was then dissolved in 10% MeOH in  $CH_2Cl_2$ . Followed filtration through a PTFE 0.2  $\mu m$  filter and evaporation of the solvent to a solid that was suspended in  $CH_2Cl_2$  and treated with excess of hexanes to afford the desired compound as an off-white/beige solid (37 mg, 76% yield).

$^1H$  NMR (600 MHz, DMSO-*d*6)  $\delta$  0.17 (ddd,  $J=9.0, 5.4, 4.8$  Hz, 2H), 0.46 (dddd,  $J=12.6, 8.4, 6.0, 4.8$  Hz, 2H), 0.99-1.06 (m, 1H), 1.75-1.89 (m, 3H), 1.92-1.99 (m, 1H), 2.10-2.24 (m, 6H), 2.28 (d,  $J=6.6$  Hz, 2H), 3.31-3.41 (m, 3H), 3.65-3.70 (m, 2H), 5.12-5.17 (m, 1H), 11.98 (s, 1H), 12.17 (s, 1H). ATR-IR ( $cm^{-1}$ ) 3169, 3089, 2976, 2940, 2898, 2849, 2751, 1700, 1676, 1570, 1500, 1460, 1450, 1374, 1329, 1302, 1287, 1262, 1249, 1205, 1188, 1150, 1124, 1111, 1048, 1020, 972, 955, 930, 902, 890, 837, 811, 795, 728, 692. LC-MS (ESI)  $m/z$  calculated for  $C_{19}H_{25}N_7O_3S_2$ : 463.15, observed [M-H]: 462.4

**N-(5-((1-(5-isobutyramido)-1,3,4-thiadiazol-2-yl)piperidin-4-yl)oxy)-1,3,4-thiadiazol-2-yl)cyclobutanecarboxamide (6h)**

Compound was prepared from N-(5-((1-(5-amino-1,3,4-thiadiazol-2-yl)piperidin-4-yl)oxy)-1,3,4-thiadiazol-2-yl) cyclobutanecarboxamide (**5c**) and isobutyryl chloride according to the general procedure 2. The product was isolated as off-white solid after purification with silica gel column and 0-10% MeOH in EtOAc and then a suspension in  $CH_2Cl_2$  and treatment with excess of hexanes (8 mg, 13% yield).

<sup>1</sup>H NMR (600 MHz, DMSO-*d*<sub>6</sub>) δ 1.09 (d, *J*=7.2 Hz, 6H), 1.77-1.89 (m, 3H), 1.90-1.99 (m, 1H), 2.10-2.24 (m, 6H), 2.69 (p, *J*=6.6 Hz, 1H), 3.38 (ddd, *J*=12.6, 8.4, 2.6 Hz, 2H), 3.65-3.70 (m, 2H), 5.12-5.17 (m, 1H), 12.00 (s, 1H), 12.17 (s, 1H). ATR-IR (cm<sup>-1</sup>) 3252, 3162, 3093, 2967, 2931, 2907, 2863, 2746, 1683, 1562, 1500, 1452, 1385, 1374, 1298, 1251, 1231, 1203, 1175, 1125, 1117, 1099, 1022, 955, 943, 904, 875, 837, 788, 747, 736, 696, 660. LC-MS (ESI) *m/z* calculated for C<sub>18</sub>H<sub>25</sub>N<sub>7</sub>O<sub>3</sub>S<sub>2</sub>: 451.15, observed [M-H]: 450.5.

### N-(5-(4-((5-(2-cyclopropylacetamido)-1,3,4-thiadiazol-2-yl)oxy)piperidin-1-yl)-1,3,4-thiadiazol-2-yl)isobutyramide (6i)

The compound was prepared from N-(5-((1-(5-amino-1,3,4-thiadiazol-2-yl)piperidin-4-yl)oxy)-1,3,4-thiadiazol-2-yl)-2-cyclopropylacetamide (**5d**) and isobutyryl chloride according to the general procedure 2. It was isolated as an off-white/beige solid after purification with silica gel column and 0-10% MeOH in EtOAc gradient followed by suspension in CH<sub>2</sub>Cl<sub>2</sub> and treatment with excess of hexanes.

<sup>1</sup>H NMR (300 MHz, DMSO-*d*<sub>6</sub>) 0.00 (ddd, *J*=9.3, 5.7, 4.5 Hz, 2H), 0.31 (dddd, *J*=10.2, 8.1, 6.0, 4.5 Hz, 2H), 0.81-0.9 (m, 1H), 0.91 (d, *J*=6.9 Hz, 6H), 1.65-1.74 (m, 2H), 1.96-2.05 (m, 2H), 2.14 (d, *J*=7.2 Hz, 2H), 2.53 (p, *J*=6.9 Hz, 1H), 3.12-3.25 (m, 2H), 3.47-3.56 (m, 2H), 4.95-5.20 (m, 1H), 11.82 (s, 1H), 12.07 (s, 1H). ATR-IR (cm<sup>-1</sup>) 3274, 3176, 3104, 3049, 2976, 2933, 2912, 2875, 2846, 2760, 1689, 1576, 1503, 1454, 1414, 1386, 1370, 1341, 1294, 1273, 1250, 1231, 1202, 1187, 1162, 1132, 1202, 1187, 1162, 1132, 1114, 1097, 1018, 970, 952, 942, 908, 875, 833, 816, 799, 772, 725, 690. LC-MS (ESI) *m/z* calculated for C<sub>18</sub>H<sub>25</sub>N<sub>7</sub>O<sub>3</sub>S<sub>2</sub>: 451.15, observed [M-H]: 450.6

### <sup>1</sup>H NMR spectra for compounds 6a-i

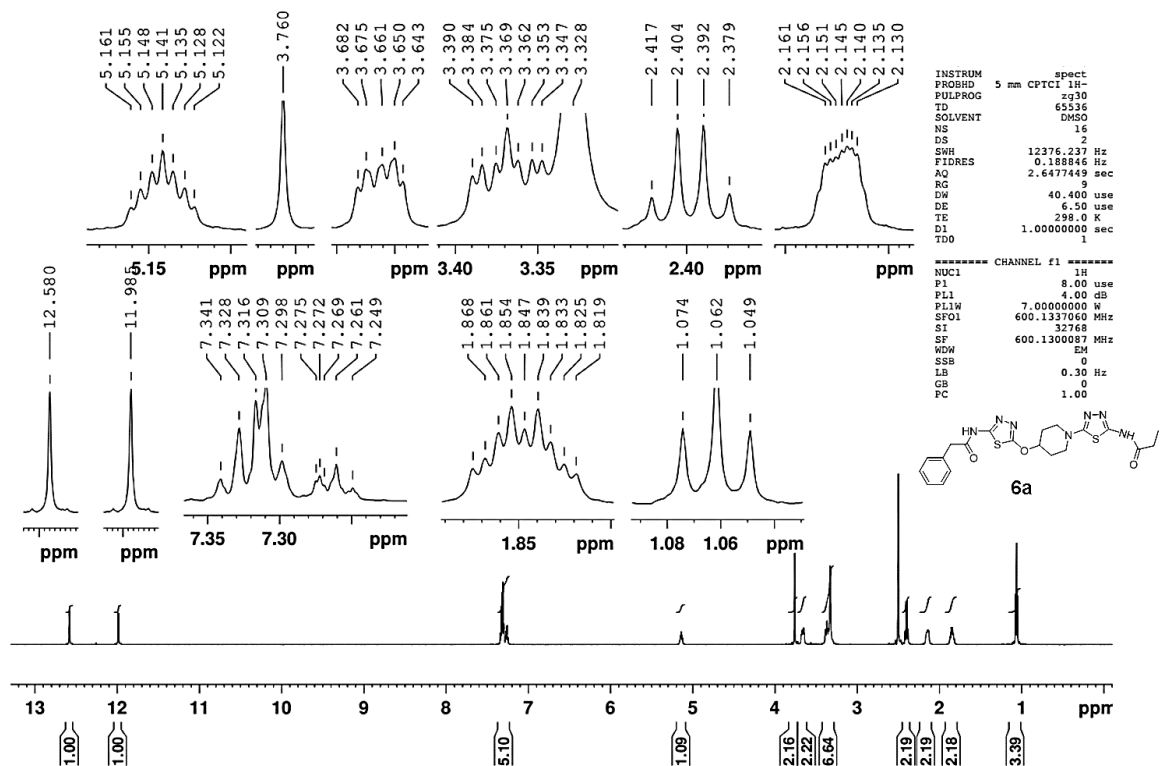

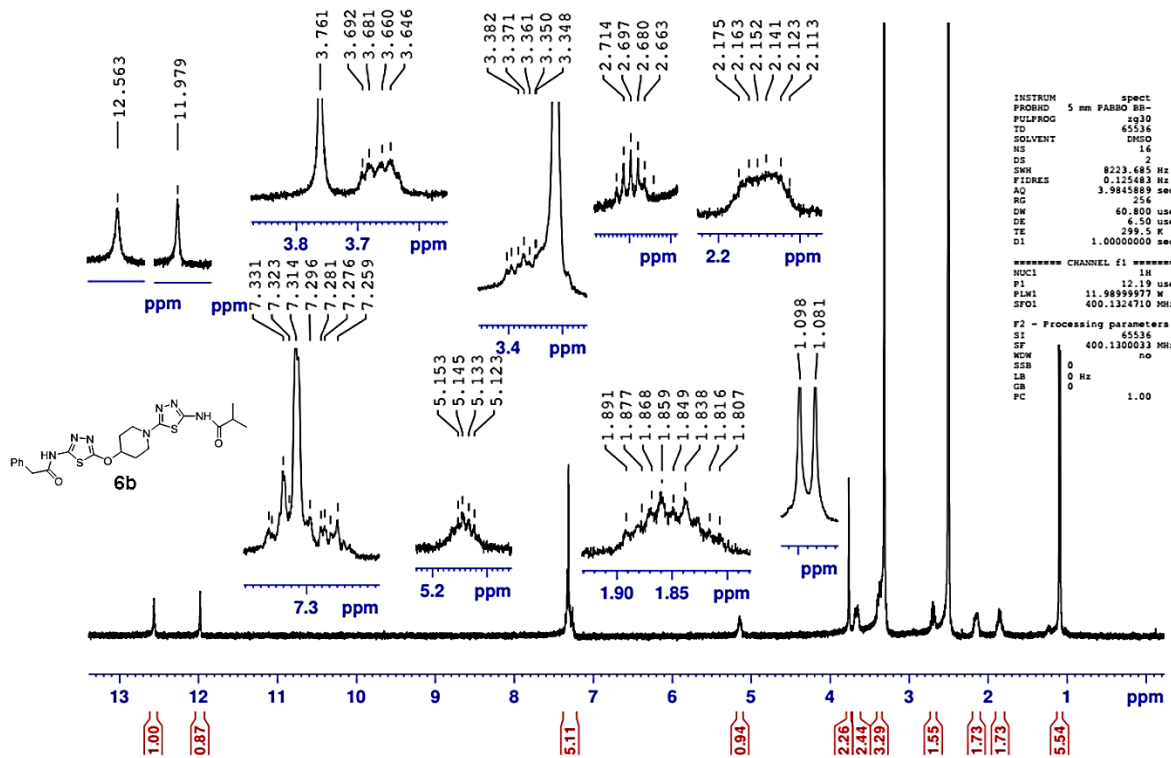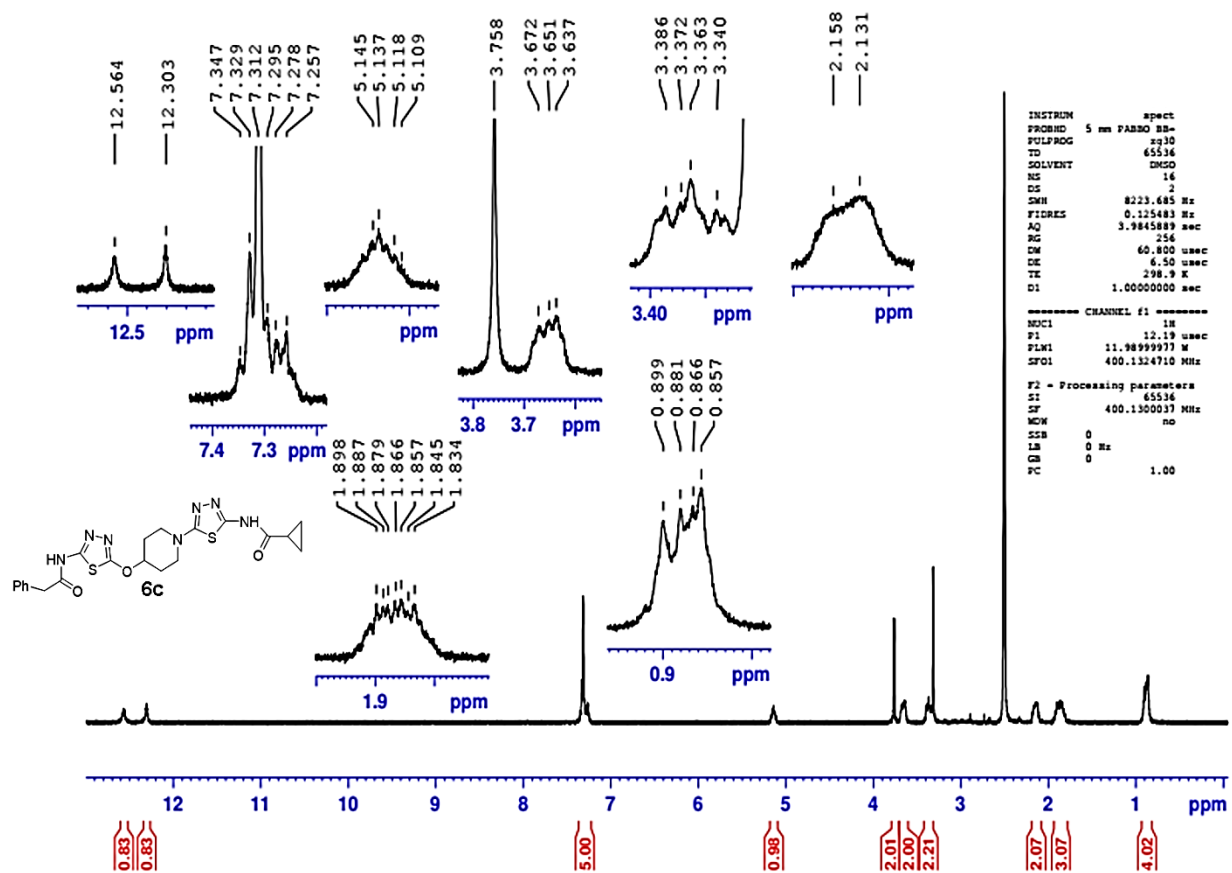

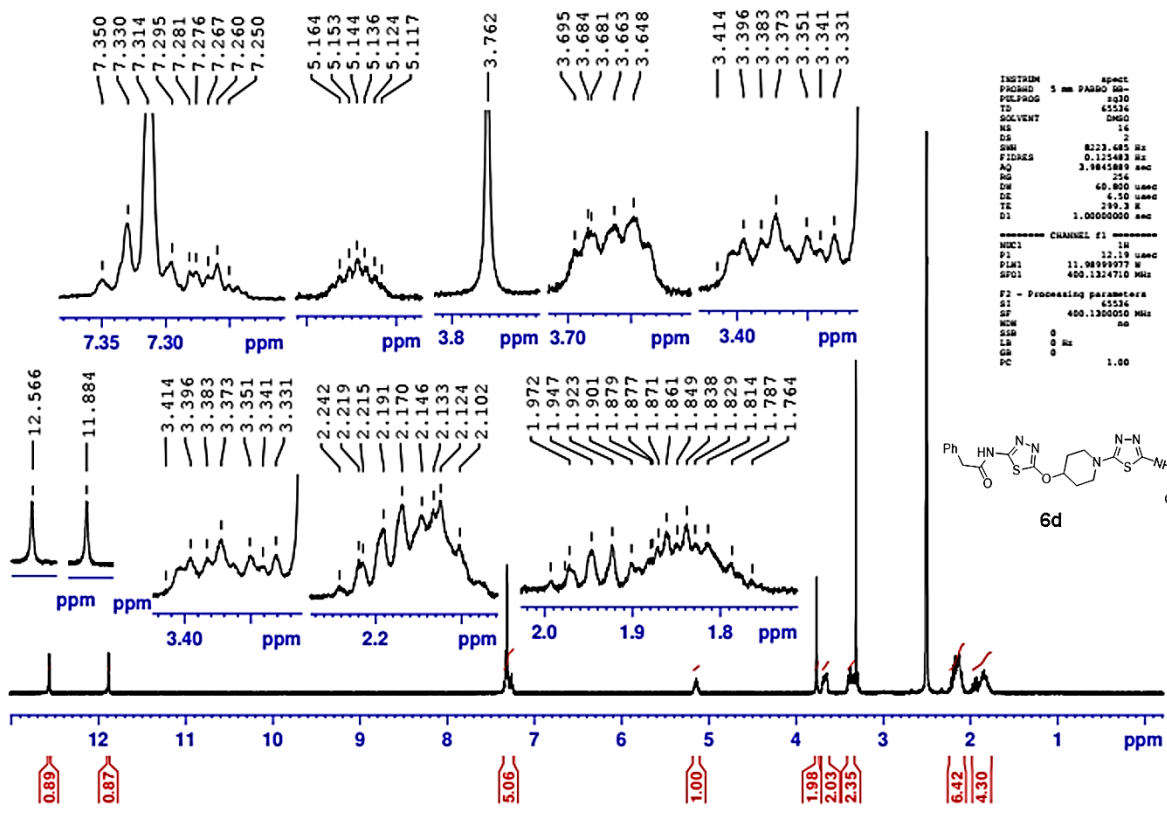

```

INSTRUM spect
PROCNO 5 mm PABBO S
PULPROG zg30
TD 65536
SOLVENT DMSO
NS 16
DS 2
SWH 823.685 Hz
FIDRES 0.125483 Hz
AQ 3.884589 sec
RG 256
DE 60.800 usec
TE 299.2 K
D1 1.00000000 sec
===== CHANNEL f1 =====
NUC1 1H
P1 12.19 usec
PL1 11.98999778 W
SFO1 400.1324710 MHz
F2 - Processing parameters
SI 65536
SF 400.1300010 MHz
WDW EM
SSB 0
LB 0 Hz
GB 0
PC 1.00
  
```

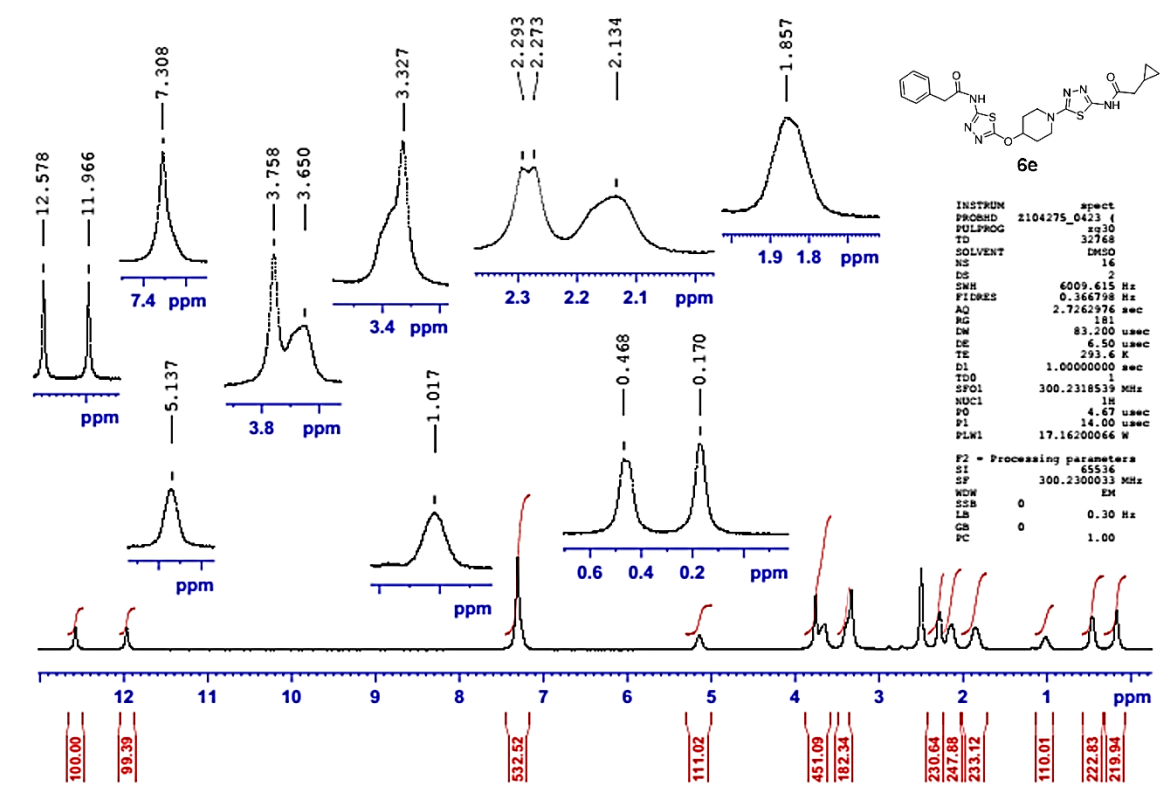

```

INSTRUM spect
PROCNO 2104275_0423 (
PULPROG zg30
TD 32768
SOLVENT DMSO
NS 16
DS 2
SWH 6009.615 Hz
FIDRES 0.368758 Hz
AQ 2.7262976 sec
RG 181
DE 83.200 usec
TE 293.6 K
D1 1.00000000 sec
D11 4.67 usec
SFO1 300.2318539 MHz
NUC1 1H
PC 14.00 usec
PL1 17.16200066 W
===== CHANNEL f1 =====
F2 - Processing parameters
SI 65536
SF 300.2300033 MHz
WDW EM
SSB 0
LB 0.30 Hz
GB 0
PC 1.00
  
```



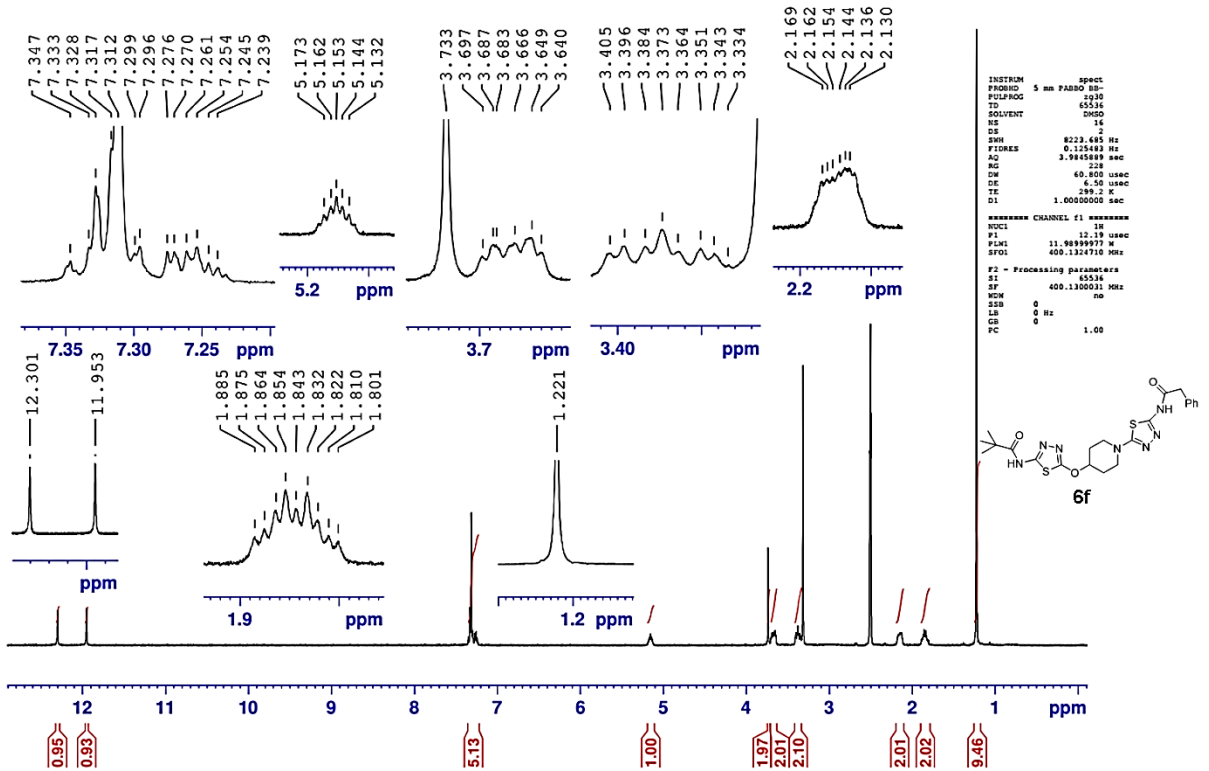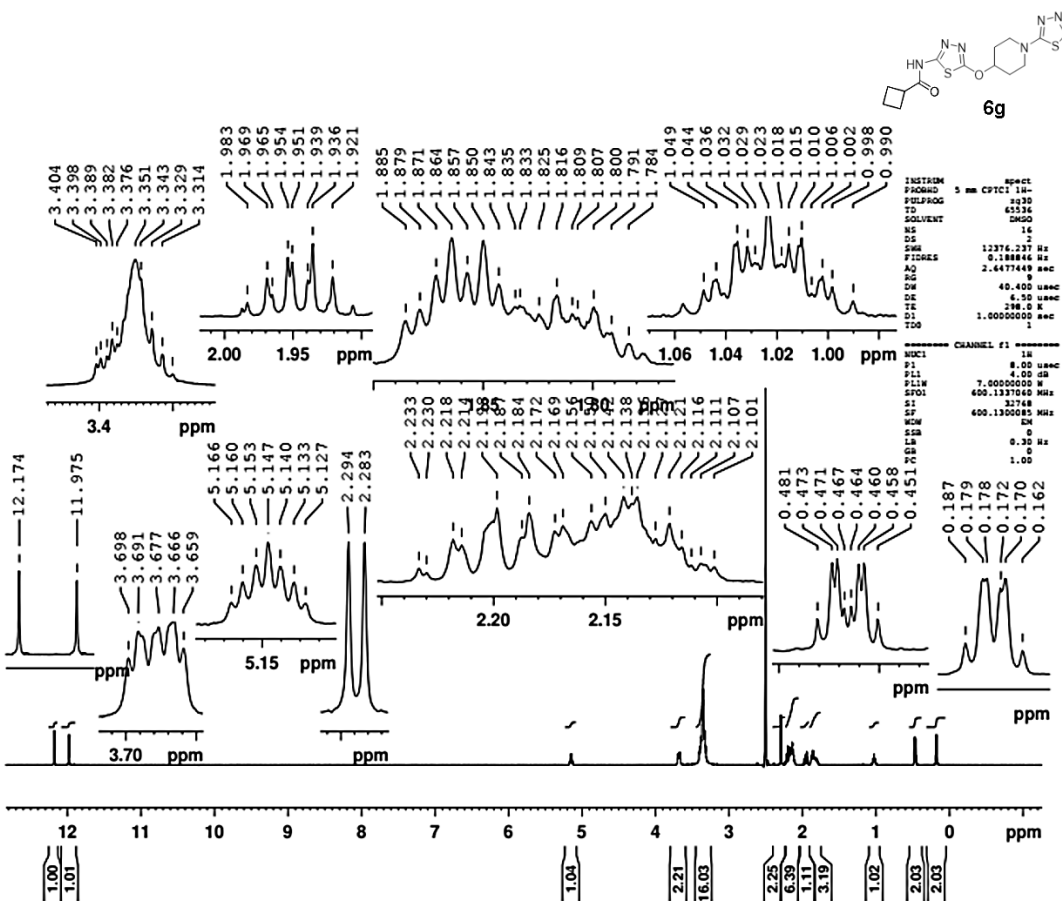

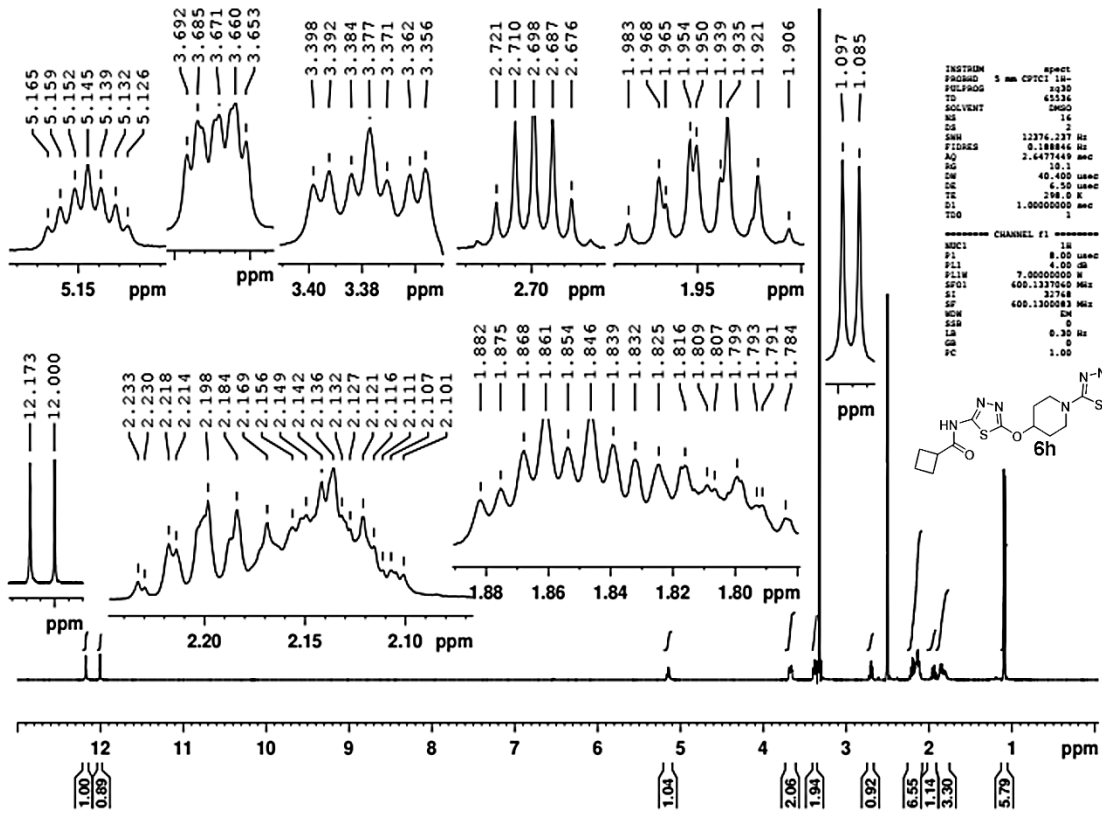

```

INSTRUM spect
PROBHD 5 mm CPYCI 1H-
PULPROG zg30
TD 65536
SOLVENT DMSO
NS 16
DS 2
SWH 12376.237 Hz
AQ 0.188844 sec
FIDRES 2.6477449 Hz
RG 228
DE 6.50 usec
TE 298.0 K
D1 1.0000000 sec
TD0 1
===== CHANNEL f1 =====
NUC1 1H
P1 8.00 usec
PL1 0.00 dB
PL1W 7.0000000 MHz
SFO1 400.1327060 MHz
SI 32768
SF 400.1300083 MHz
SSB 0
SFB 0
LB 0.30 Hz
GB 0
PC 1.00
  
```

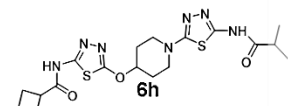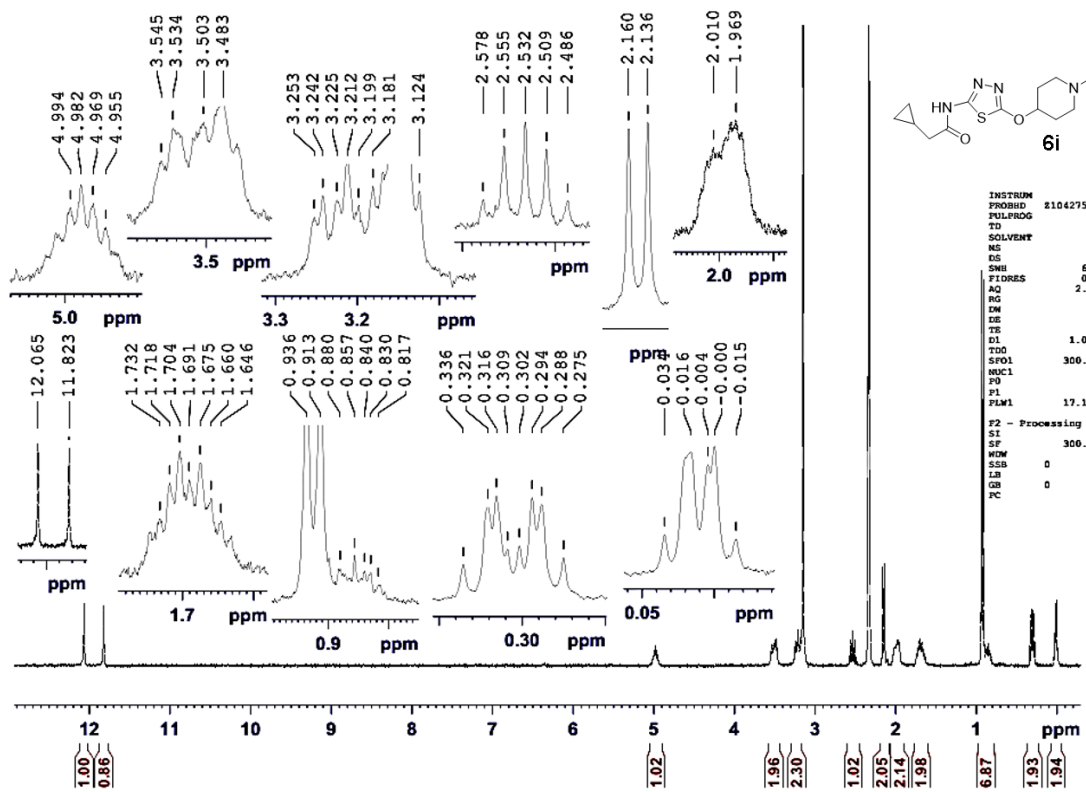

```

INSTRUM spect
PROBHD Z104275_0423 (
PULPROG zg30
TD 65536
SOLVENT DMSO
NS 16
DS 2
SWH 6009.615 Hz
AQ 0.366798 sec
FIDRES 2.7262976 Hz
RG 228
DE 6.50 usec
TE 295.0 K
D1 1.0000000 sec
TD0 1
SFO1 300.2318539 MHz
SI 32768
SF 300.2300083 MHz
SSB 0
SFB 0
LB 0.30 Hz
GB 0
PC 1.00
  
```

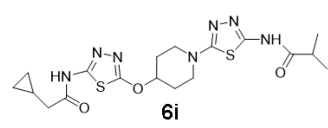

## References

1. McDermott, L. A.; Iyer, P.; Verneti, L.; Rimer, S.; Sun, J.; Bobby, M.; Yang, T.; Fioravanti, M.; O'Neill, J.; Wang, L.; Drakes, D.; Katt, W.; Huang, Q.; Cerione, R., Design and evaluation of novel glutaminase inhibitors. *Bioorg Med Chem* **2016**, *24* (8), 1819-39.
